# Supplementary material
Source: publisher figshare collection journal article supplement (https://frontiersin.figshare.com/ndownloader/files/17280203)
Supplement: Supplementary file [file 17280203]

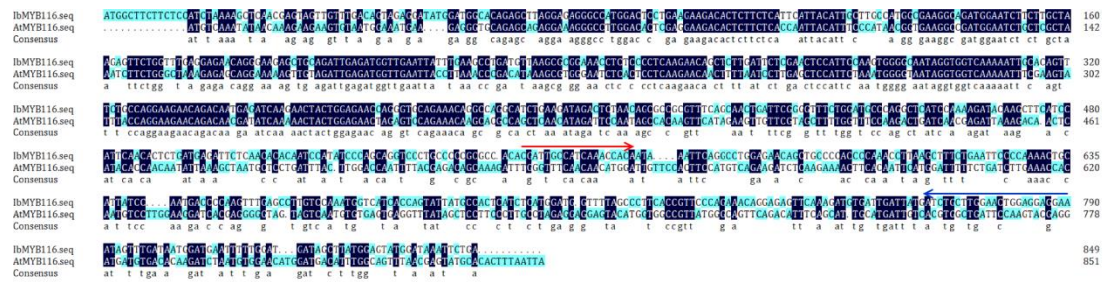

**FIGURE S1** | Sequence alignment of *IbMYB116* with *AtMYB116*. → and ← indicate forward primer (IbMYB116-F: CGATTGCCATCAAACCACA) and reverse primer (IbMYB116-R: CTCCTCCAGTTCCAAGCAGAT).

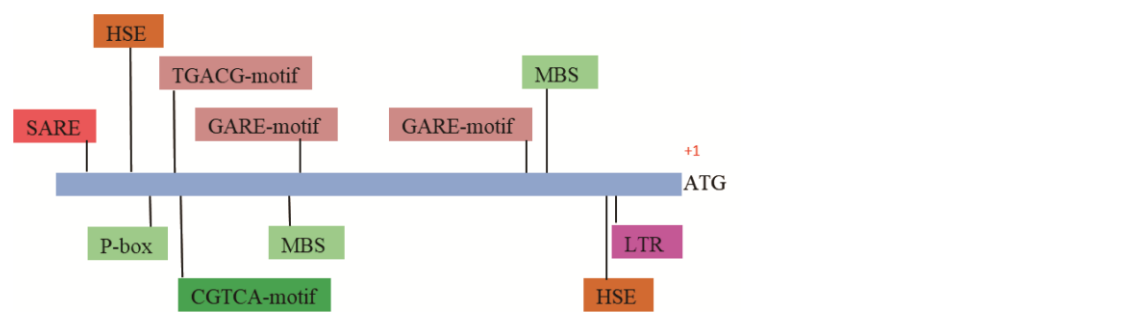

**FIGURE S2** | The promoter of *IbMYB116* showing different *cis*-acting regulatory elements associated with abiotic stresses.

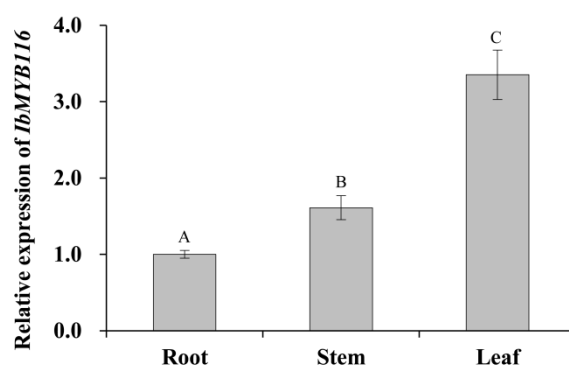

**FIGURE S3** | Expression analysis of *IbMYB116* in root, stem and leaf tissues of *in vitro*-grown Xushu55-2. Data are presented as the means  $\pm$  SE ( $n = 3$ ). Different capital letters indicate a significant difference at  $P < 0.01$  according to the Student's *t*-test.

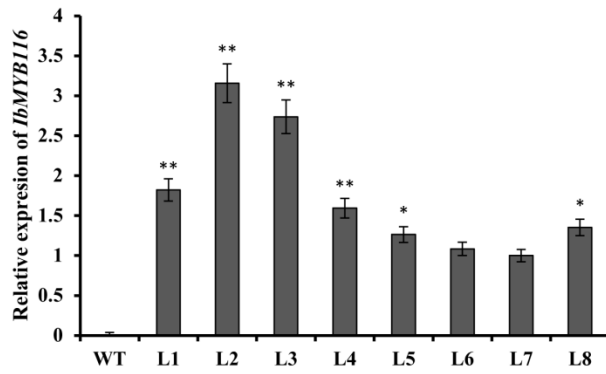

**FIGURE S4** | Expression analysis of *IbMYB116* in the transgenic *Arabidopsis* plants. *Atactin* (NM112764) was used as an internal control and the relative expression levels were calibrated using the transgenic line (L7) with the lowest expression. Data are presented as the means  $\pm$  SE ( $n = 3$ ). \* and \*\* indicate significant differences from L7 at  $P < 0.05$  and  $P < 0.01$ , respectively, according to the Student's *t*-test.
